# Supplementary material
Source: publisher figshare collection journal article supplement (https://acs.figshare.com/ndownloader/files/5841417)
Supplement: Supplementary file 1 [file 5841417]

 
data_shelxl
 
_audit_creation_method            SHELXL-97
_chemical_name_systematic
;
 ?
;
_chemical_name_common             ?
_chemical_melting_point           ?
_chemical_formula_moiety          ?
_chemical_formula_sum
 'C42 H50 N6 O9'
_chemical_formula_weight          782.88
 
loop_
 _atom_type_symbol
 _atom_type_description
 _atom_type_scat_dispersion_real
 _atom_type_scat_dispersion_imag
 _atom_type_scat_source
 'C'  'C'   0.0033   0.0016
 'International Tables Vol C Tables 4.2.6.8 and 6.1.1.4'
 'H'  'H'   0.0000   0.0000
 'International Tables Vol C Tables 4.2.6.8 and 6.1.1.4'
 'N'  'N'   0.0061   0.0033
 'International Tables Vol C Tables 4.2.6.8 and 6.1.1.4'
 'O'  'O'   0.0106   0.0060
 'International Tables Vol C Tables 4.2.6.8 and 6.1.1.4'
 
_symmetry_cell_setting            orthorhombic
_symmetry_space_group_name_H-M    'Pccn'
 
loop_
 _symmetry_equiv_pos_as_xyz
 'x, y, z'
 '-x+1/2, -y+1/2, z'
 'x+1/2, -y, -z+1/2'
 '-x, y+1/2, -z+1/2'
 '-x, -y, -z'
 'x-1/2, y-1/2, -z'
 '-x-1/2, y, z-1/2'
 'x, -y-1/2, z-1/2'
 
_cell_length_a                    11.2522(5)
_cell_length_b                    22.9890(12)
_cell_length_c                    37.8075(15)
_cell_angle_alpha                 90.00
_cell_angle_beta                  90.00
_cell_angle_gamma                 90.00
_cell_volume                      9779.9(8)
_cell_formula_units_Z             8
_cell_measurement_temperature     173(2)
_cell_measurement_reflns_used     36992
_cell_measurement_theta_min       2.07
_cell_measurement_theta_max       25.03
 
_exptl_crystal_description        block
_exptl_crystal_colour             colourless
_exptl_crystal_size_max           0.50
_exptl_crystal_size_mid           0.50
_exptl_crystal_size_min           0.20
_exptl_crystal_density_meas       ?
_exptl_crystal_density_diffrn     1.063
_exptl_crystal_density_method     'not measured'
_exptl_crystal_F_000              3328
_exptl_absorpt_coefficient_mu     0.076
_exptl_absorpt_correction_type    multi-scan
_exptl_absorpt_correction_T_min   0.4832
_exptl_absorpt_correction_T_max   1.0000
_exptl_absorpt_process_details    ?
 
_exptl_special_details
;
 ?
;
 
_diffrn_ambient_temperature       173(2)
_diffrn_radiation_wavelength      0.71069
_diffrn_radiation_type            MoK\a
_diffrn_radiation_source          'fine-focus sealed tube'
_diffrn_radiation_monochromator   graphite
_diffrn_measurement_device_type   'Rigaku/ADSC CCD'
_diffrn_measurement_method        'area detector'
_diffrn_detector_area_resol_mean  11.76
_diffrn_standards_number          ?
_diffrn_standards_interval_count  ?
_diffrn_standards_interval_time   ?
_diffrn_standards_decay_%         ?
_diffrn_reflns_number             8537
_diffrn_reflns_av_R_equivalents   0.0000
_diffrn_reflns_av_sigmaI/netI     0.1487
_diffrn_reflns_limit_h_min        0
_diffrn_reflns_limit_h_max        13
_diffrn_reflns_limit_k_min        0
_diffrn_reflns_limit_k_max        27
_diffrn_reflns_limit_l_min        0
_diffrn_reflns_limit_l_max        44
_diffrn_reflns_theta_min          2.07
_diffrn_reflns_theta_max          25.03
_reflns_number_total              8537
_reflns_number_gt                 3691
_reflns_threshold_expression      >2sigma(I)
 
_computing_data_collection        ?
_computing_cell_refinement        ?
_computing_data_reduction         ?
_computing_structure_solution     ?
_computing_structure_refinement   'SHELXL-97 (Sheldrick, 1997)'
_computing_molecular_graphics     ?
_computing_publication_material   ?
 
_refine_special_details
;
 Refinement of F^2^ against ALL reflections.  The weighted R-factor wR and
 goodness of fit S are based on F^2^, conventional R-factors R are based
 on F, with F set to zero for negative F^2^. The threshold expression of
 F^2^ > 2sigma(F^2^) is used only for calculating R-factors(gt) etc. and is
 not relevant to the choice of reflections for refinement.  R-factors based
 on F^2^ are statistically about twice as large as those based on F, and R-
 factors based on ALL data will be even larger.
;
 
_refine_ls_structure_factor_coef  Fsqd
_refine_ls_matrix_type            full
_refine_ls_weighting_scheme       calc
_refine_ls_weighting_details
 'calc w=1/[\s^2^(Fo^2^)+(0.1518P)^2^+0.0000P] where P=(Fo^2^+2Fc^2^)/3'
_atom_sites_solution_primary      direct
_atom_sites_solution_secondary    difmap
_atom_sites_solution_hydrogens    geom
_refine_ls_hydrogen_treatment     mixed
_refine_ls_extinction_method      none
_refine_ls_extinction_coef        ?
_refine_ls_number_reflns          8537
_refine_ls_number_parameters      572
_refine_ls_number_restraints      0
_refine_ls_R_factor_all           0.1556
_refine_ls_R_factor_gt            0.1010
_refine_ls_wR_factor_ref          0.2918
_refine_ls_wR_factor_gt           0.2585
_refine_ls_goodness_of_fit_ref    0.920
_refine_ls_restrained_S_all       0.920
_refine_ls_shift/su_max           0.804
_refine_ls_shift/su_mean          0.002
 
loop_
 _atom_site_label
 _atom_site_type_symbol
 _atom_site_fract_x
 _atom_site_fract_y
 _atom_site_fract_z
 _atom_site_U_iso_or_equiv
 _atom_site_adp_type
 _atom_site_occupancy
 _atom_site_symmetry_multiplicity
 _atom_site_calc_flag
 _atom_site_refinement_flags
 _atom_site_disorder_assembly
 _atom_site_disorder_group
O1 O 0.1064(4) 0.27941(15) 0.48720(8) 0.0696(11) Uani 1 1 d . A 1
O2 O 0.1057(3) 0.14161(12) 0.39453(7) 0.0500(8) Uani 1 1 d . A 1
O3 O 0.1102(3) 0.34249(12) 0.36928(8) 0.0533(9) Uani 1 1 d . A 1
O4 O 0.3755(4) 0.56943(14) 0.37053(10) 0.0743(11) Uani 1 1 d . A 1
O5 O 0.4354(3) 0.48064(13) 0.35112(9) 0.0618(10) Uani 1 1 d . A 1
O6 O 0.3426(3) 0.15948(13) 0.61098(8) 0.0542(9) Uani 1 1 d . A 1
O7 O 0.4236(3) 0.22786(13) 0.57578(8) 0.0566(9) Uani 1 1 d . A 1
O8 O 0.3343(3) 0.02473(13) 0.26981(9) 0.0623(10) Uani 1 1 d . A 1
O9 O 0.3984(3) 0.03086(13) 0.32623(9) 0.0625(10) Uani 1 1 d . A 1
N1 N 0.1233(8) 0.4199(4) 0.41807(19) 0.0294(17) Uani 0.656(7) 1 d P A 1
N2 N 0.3200(15) 0.4865(6) 0.3990(4) 0.053(4) Uani 0.656(7) 1 d P A 1
N3 N 0.1360(7) 0.1626(3) 0.50020(18) 0.043(2) Uiso 0.629(10) 1 d P A 1
N4 N 0.2898(7) 0.1676(3) 0.55240(17) 0.037(2) Uiso 0.629(10) 1 d P A 1
N5 N 0.1276(4) 0.18122(15) 0.32815(9) 0.0427(9) Uani 1 1 d . A 1
N6 N 0.3000(4) 0.10518(16) 0.30375(11) 0.0514(11) Uani 1 1 d . A 1
C1 C 0.1020(4) 0.31444(18) 0.42890(12) 0.0498(12) Uani 1 1 d . A 1
C2 C 0.1025(4) 0.2684(2) 0.45451(11) 0.0510(12) Uani 1 1 d . A 1
C3 C 0.0992(4) 0.20824(18) 0.44266(11) 0.0448(11) Uani 1 1 d . A 1
C4 C 0.1010(4) 0.19361(18) 0.40520(11) 0.0427(10) Uani 1 1 d . A 1
C5 C 0.1001(4) 0.24113(16) 0.38030(10) 0.0391(10) Uani 1 1 d . A 1
C6 C 0.1028(4) 0.30214(19) 0.39107(11) 0.0437(11) Uani 1 1 d . A 1
C7 C 0.1144(5) 0.3708(2) 0.44054(14) 0.0618(15) Uani 1 1 d . A 1
H7 H 0.1172 0.3772 0.4653 0.074 Uiso 1 1 calc R A 1
C8 C 0.1331(5) 0.47665(13) 0.43089(11) 0.0334(17) Uani 0.656(7) 1 d PG A 1
C9 C 0.0468(4) 0.49896(16) 0.45343(11) 0.051(2) Uani 0.656(7) 1 d PG A 1
H9 H -0.0175 0.4751 0.4608 0.061 Uiso 0.656(7) 1 calc PR A 1
C10 C 0.0546(5) 0.55615(17) 0.46514(12) 0.072(3) Uani 0.656(7) 1 d PG A 1
H10 H -0.0043 0.5714 0.4805 0.086 Uiso 0.656(7) 1 calc PR A 1
C11 C 0.1488(6) 0.59103(13) 0.45431(12) 0.062(3) Uani 0.656(7) 1 d PG A 1
H11 H 0.1541 0.6301 0.4623 0.075 Uiso 0.656(7) 1 calc PR A 1
C12 C 0.2351(5) 0.56872(18) 0.43177(13) 0.056(3) Uani 0.656(7) 1 d PG A 1
H12 H 0.2994 0.5926 0.4244 0.067 Uiso 0.656(7) 1 calc PR A 1
C13 C 0.2272(4) 0.51153(19) 0.42006(12) 0.038(2) Uani 0.656(7) 1 d PG A 1
C14 C 0.3767(5) 0.5179(2) 0.37264(13) 0.0574(13) Uani 1 1 d . A 1
C15 C 0.5107(5) 0.5047(2) 0.32222(13) 0.0616(14) Uani 1 1 d . A 1
C16 C 0.5507(6) 0.4512(2) 0.30357(15) 0.0786(18) Uani 1 1 d . A 1
H16A H 0.5935 0.4260 0.3202 0.118 Uiso 1 1 calc R A 1
H16B H 0.6034 0.4619 0.2840 0.118 Uiso 1 1 calc R A 1
H16C H 0.4814 0.4304 0.2943 0.118 Uiso 1 1 calc R A 1
C17 C 0.4406(5) 0.5434(3) 0.29791(15) 0.0779(17) Uani 1 1 d . A 1
H17A H 0.3689 0.5229 0.2900 0.117 Uiso 1 1 calc R A 1
H17B H 0.4893 0.5535 0.2773 0.117 Uiso 1 1 calc R A 1
H17C H 0.4179 0.5789 0.3105 0.117 Uiso 1 1 calc R A 1
C18 C 0.6121(5) 0.5373(3) 0.33852(15) 0.0828(19) Uani 1 1 d . A 1
H18A H 0.5811 0.5691 0.3531 0.124 Uiso 1 1 calc R A 1
H18B H 0.6627 0.5533 0.3198 0.124 Uiso 1 1 calc R A 1
H18C H 0.6589 0.5108 0.3533 0.124 Uiso 1 1 calc R A 1
C19 C 0.1095(4) 0.1629(2) 0.46613(12) 0.0565(13) Uani 1 1 d . A 1
H19 H 0.0953 0.1256 0.4562 0.068 Uiso 1 1 calc R A 1
C20 C 0.1187(5) 0.12341(16) 0.52442(10) 0.0315(16) Uiso 0.629(10) 1 d PG A 1
C21 C 0.0349(4) 0.07924(19) 0.52162(10) 0.0381(18) Uiso 0.629(10) 1 d PG A 1
H21 H -0.0263 0.0817 0.5044 0.046 Uiso 0.629(10) 1 calc PR A 1
C22 C 0.0406(5) 0.03140(17) 0.54403(12) 0.050(2) Uiso 0.629(10) 1 d PG A 1
H22 H -0.0167 0.0012 0.5421 0.059 Uiso 0.629(10) 1 calc PR A 1
C23 C 0.1302(5) 0.02773(17) 0.56925(11) 0.046(2) Uiso 0.629(10) 1 d PG A 1
H23 H 0.1341 -0.0050 0.5846 0.056 Uiso 0.629(10) 1 calc PR A 1
C24 C 0.2140(5) 0.07190(19) 0.57205(11) 0.0384(18) Uiso 0.629(10) 1 d PG A 1
H24 H 0.2753 0.0694 0.5893 0.046 Uiso 0.629(10) 1 calc PR A 1
C25 C 0.2083(4) 0.11974(17) 0.54963(12) 0.0369(17) Uiso 0.629(10) 1 d PG A 1
C26 C 0.3557(4) 0.18186(17) 0.58224(11) 0.0435(11) Uani 1 1 d . A 1
C27 C 0.5012(4) 0.25222(19) 0.60376(12) 0.0506(12) Uani 1 1 d . A 1
C28 C 0.5656(7) 0.3003(3) 0.58450(17) 0.106(3) Uani 1 1 d . A 1
H28A H 0.6057 0.2843 0.5637 0.160 Uiso 1 1 calc R A 1
H28B H 0.6246 0.3179 0.6003 0.160 Uiso 1 1 calc R A 1
H28C H 0.5083 0.3300 0.5770 0.160 Uiso 1 1 calc R A 1
C29 C 0.4282(6) 0.2775(3) 0.63301(15) 0.0804(18) Uani 1 1 d . A 1
H29A H 0.3678 0.3035 0.6230 0.121 Uiso 1 1 calc R A 1
H29B H 0.4797 0.2995 0.6491 0.121 Uiso 1 1 calc R A 1
H29C H 0.3891 0.2461 0.6461 0.121 Uiso 1 1 calc R A 1
C30 C 0.5875(6) 0.2068(2) 0.6165(2) 0.097(2) Uani 1 1 d . A 1
H30A H 0.5437 0.1750 0.6278 0.145 Uiso 1 1 calc R A 1
H30B H 0.6424 0.2243 0.6336 0.145 Uiso 1 1 calc R A 1
H30C H 0.6325 0.1915 0.5963 0.145 Uiso 1 1 calc R A 1
C31 C 0.1127(4) 0.23143(17) 0.34404(10) 0.0389(10) Uani 1 1 d . A 1
H31 H 0.1103 0.2648 0.3293 0.047 Uiso 1 1 calc R A 1
C32 C 0.1485(4) 0.17586(16) 0.29138(10) 0.0419(11) Uani 1 1 d . A 1
C33 C 0.0862(5) 0.21000(18) 0.26723(11) 0.0533(13) Uani 1 1 d . A 1
H33 H 0.0269 0.2360 0.2755 0.064 Uiso 1 1 calc R A 1
C34 C 0.1092(5) 0.20660(19) 0.23191(12) 0.0573(14) Uani 1 1 d . A 1
H34 H 0.0654 0.2299 0.2157 0.069 Uiso 1 1 calc R A 1
C35 C 0.1950(5) 0.16982(19) 0.21974(12) 0.0616(15) Uani 1 1 d . A 1
H35 H 0.2110 0.1675 0.1951 0.074 Uiso 1 1 calc R A 1
C36 C 0.2595(5) 0.13545(18) 0.24350(11) 0.0534(12) Uani 1 1 d . A 1
H36 H 0.3196 0.1101 0.2349 0.064 Uiso 1 1 calc R A 1
C37 C 0.2368(4) 0.13805(16) 0.27917(11) 0.0446(11) Uani 1 1 d . A 1
C38 C 0.3439(4) 0.04999(18) 0.29707(13) 0.0498(12) Uani 1 1 d . A 1
C39 C 0.4756(6) -0.0226(2) 0.32274(15) 0.0731(17) Uani 1 1 d . A 1
C40 C 0.5732(6) -0.0130(3) 0.29555(19) 0.090(2) Uani 1 1 d . A 1
H40A H 0.6167 0.0227 0.3013 0.135 Uiso 1 1 calc R A 1
H40B H 0.5378 -0.0094 0.2720 0.135 Uiso 1 1 calc R A 1
H40C H 0.6281 -0.0461 0.2959 0.135 Uiso 1 1 calc R A 1
C41 C 0.3960(6) -0.0752(2) 0.3146(2) 0.093(2) Uani 1 1 d . A 1
H41A H 0.4444 -0.1107 0.3143 0.139 Uiso 1 1 calc R A 1
H41B H 0.3586 -0.0700 0.2914 0.139 Uiso 1 1 calc R A 1
H41C H 0.3344 -0.0786 0.3328 0.139 Uiso 1 1 calc R A 1
C42 C 0.5272(8) -0.0273(3) 0.35902(18) 0.104(2) Uani 1 1 d . A 1
H42A H 0.5708 0.0084 0.3647 0.156 Uiso 1 1 calc R A 1
H42B H 0.5815 -0.0606 0.3600 0.156 Uiso 1 1 calc R A 1
H42C H 0.4631 -0.0329 0.3762 0.156 Uiso 1 1 calc R A 1
N1B N 0.158(2) 0.4096(10) 0.4303(6) 0.064(5) Uani 0.344(7) 1 d P A 2
N2B N 0.307(3) 0.4821(17) 0.3923(8) 0.056(9) Uiso 0.344(7) 1 d P A 2
C9B C 0.1416(11) 0.4791(5) 0.4791(4) 0.085(6) Uani 0.344(7) 1 d PG A 2
H9B H 0.0864 0.4542 0.4906 0.101 Uiso 0.344(7) 1 calc PR A 2
C10B C 0.1721(14) 0.5320(6) 0.4943(3) 0.117(9) Uani 0.344(7) 1 d PG A 2
H10B H 0.1377 0.5433 0.5162 0.140 Uiso 0.344(7) 1 calc PR A 2
C11B C 0.2529(15) 0.5685(5) 0.4775(5) 0.150(13) Uani 0.344(7) 1 d PG A 2
H11B H 0.2737 0.6047 0.4880 0.180 Uiso 0.344(7) 1 calc PR A 2
C12B C 0.3032(14) 0.5520(6) 0.4455(4) 0.115(9) Uani 0.344(7) 1 d PG A 2
H12B H 0.3584 0.5769 0.4340 0.138 Uiso 0.344(7) 1 calc PR A 2
C13B C 0.2727(14) 0.4990(6) 0.4303(4) 0.064(6) Uani 0.344(7) 1 d PG A 2
C8B C 0.1919(12) 0.4626(5) 0.4470(4) 0.084(7) Uani 0.344(7) 1 d PG A 2
N3B N 0.1017(11) 0.1749(5) 0.5023(3) 0.029(3) Uiso 0.371(10) 1 d P A 2
N4B N 0.3233(10) 0.1578(4) 0.5508(3) 0.023(3) Uiso 0.371(10) 1 d P A 2
C20B C 0.2533(9) 0.1103(3) 0.5481(2) 0.037(3) Uiso 0.371(10) 1 d PG A 2
C21B C 0.2712(9) 0.0626(4) 0.5701(2) 0.053(4) Uiso 0.371(10) 1 d PG A 2
H21B H 0.3323 0.0635 0.5874 0.064 Uiso 0.371(10) 1 calc PR A 2
C22B C 0.1998(12) 0.0136(3) 0.5666(2) 0.069(4) Uiso 0.371(10) 1 d PG A 2
H22B H 0.2120 -0.0190 0.5816 0.082 Uiso 0.371(10) 1 calc PR A 2
C23B C 0.1104(12) 0.0123(4) 0.5412(3) 0.096(6) Uiso 0.371(10) 1 d PG A 2
H23B H 0.0616 -0.0211 0.5389 0.115 Uiso 0.371(10) 1 calc PR A 2
C24B C 0.0925(10) 0.0601(5) 0.5193(2) 0.075(5) Uiso 0.371(10) 1 d PG A 2
H24B H 0.0315 0.0592 0.5020 0.090 Uiso 0.371(10) 1 calc PR A 2
C25B C 0.1640(10) 0.1091(4) 0.5227(2) 0.046(3) Uiso 0.371(10) 1 d PG A 2
H6 H 0.316(3) 0.1129(14) 0.3218(9) 0.007(9) Uiso 1 1 d . B 1
H5 H 0.119(5) 0.155(2) 0.3449(15) 0.077(18) Uiso 1 1 d . C 1
H6B H 0.259(9) 0.022(4) 0.358(3) 0.21(4) Uiso 1 1 d . D 2
H2 H 0.249(11) 0.189(5) 0.338(2) 0.22(4) Uiso 1 1 d . E 2
H1A H 0.129(4) 0.4104(19) 0.3932(14) 0.057(14) Uiso 1 1 d . . .
H2A H 0.327(4) 0.4580(15) 0.3990(9) 0.000(10) Uiso 1 1 d . . .
H4A H 0.338(4) 0.1742(17) 0.5314(11) 0.043(11) Uiso 1 1 d . . .
H3A H 0.115(7) 0.216(4) 0.5060(19) 0.14(3) Uiso 1 1 d . . .
 
loop_
 _atom_site_aniso_label
 _atom_site_aniso_U_11
 _atom_site_aniso_U_22
 _atom_site_aniso_U_33
 _atom_site_aniso_U_23
 _atom_site_aniso_U_13
 _atom_site_aniso_U_12
O1 0.095(3) 0.073(2) 0.0408(19) -0.0134(16) 0.0043(18) -0.041(2)
O2 0.073(2) 0.0373(16) 0.0395(16) 0.0006(13) -0.0124(15) -0.0048(15)
O3 0.075(2) 0.0322(15) 0.0527(19) -0.0003(14) 0.0199(17) 0.0018(15)
O4 0.092(3) 0.043(2) 0.088(3) 0.0001(17) 0.023(2) -0.0140(19)
O5 0.076(2) 0.0503(18) 0.059(2) 0.0086(16) 0.0197(18) -0.0163(17)
O6 0.069(2) 0.0494(18) 0.0448(18) 0.0111(14) -0.0133(16) -0.0159(16)
O7 0.077(2) 0.0473(17) 0.0457(18) 0.0060(14) -0.0097(16) -0.0308(17)
O8 0.085(3) 0.0405(17) 0.062(2) -0.0145(16) -0.0026(19) 0.0132(17)
O9 0.079(3) 0.0428(18) 0.066(2) -0.0031(15) -0.0096(19) 0.0188(17)
N1 0.045(5) 0.023(3) 0.020(4) 0.005(3) 0.005(3) -0.002(3)
N2 0.094(8) 0.024(4) 0.040(6) -0.011(3) 0.017(5) -0.037(4)
N5 0.060(3) 0.0301(18) 0.038(2) -0.0002(16) -0.0059(18) 0.0064(17)
N6 0.074(3) 0.036(2) 0.044(2) -0.0075(18) -0.013(2) 0.0152(19)
C1 0.059(3) 0.037(2) 0.054(3) -0.008(2) 0.017(2) -0.011(2)
C2 0.052(3) 0.065(3) 0.036(2) -0.009(2) 0.003(2) -0.026(2)
C3 0.053(3) 0.045(2) 0.037(2) -0.0019(19) -0.004(2) -0.018(2)
C4 0.047(3) 0.043(2) 0.039(2) -0.0018(19) -0.010(2) -0.010(2)
C5 0.047(3) 0.030(2) 0.040(2) -0.0002(17) 0.002(2) -0.0008(18)
C6 0.042(3) 0.046(2) 0.044(2) -0.004(2) 0.006(2) -0.003(2)
C7 0.071(4) 0.053(3) 0.062(3) -0.017(3) 0.030(3) -0.024(3)
C8 0.061(5) 0.020(3) 0.019(3) 0.004(2) 0.003(3) 0.006(3)
C9 0.089(6) 0.030(3) 0.034(4) 0.002(3) 0.027(4) 0.015(3)
C10 0.140(9) 0.039(4) 0.036(4) 0.004(3) 0.030(5) 0.034(5)
C11 0.121(8) 0.020(3) 0.046(4) -0.005(3) 0.010(5) 0.012(4)
C12 0.104(8) 0.026(3) 0.039(4) 0.002(3) 0.001(4) -0.017(4)
C13 0.055(5) 0.032(4) 0.026(3) 0.000(3) -0.006(3) -0.001(3)
C14 0.066(3) 0.047(3) 0.059(3) -0.005(2) 0.014(3) -0.013(3)
C15 0.066(4) 0.060(3) 0.060(3) 0.009(3) 0.014(3) -0.014(3)
C16 0.097(5) 0.059(3) 0.080(4) 0.004(3) 0.036(3) -0.007(3)
C17 0.064(4) 0.097(4) 0.073(4) 0.021(3) 0.006(3) -0.001(3)
C18 0.073(4) 0.104(5) 0.071(4) 0.012(3) 0.013(3) -0.035(4)
C19 0.065(3) 0.068(3) 0.037(2) -0.002(2) -0.007(2) -0.030(3)
C26 0.056(3) 0.036(2) 0.039(2) 0.0063(19) 0.001(2) -0.010(2)
C27 0.060(3) 0.041(2) 0.051(3) -0.002(2) -0.011(2) -0.013(2)
C28 0.137(7) 0.092(5) 0.090(5) 0.013(4) -0.022(4) -0.074(5)
C29 0.085(4) 0.079(4) 0.078(4) -0.026(3) -0.021(3) -0.018(3)
C30 0.071(4) 0.060(3) 0.159(7) 0.003(4) -0.043(4) -0.003(3)
C31 0.047(3) 0.032(2) 0.037(2) -0.0018(17) -0.0009(19) 0.0049(18)
C32 0.066(3) 0.028(2) 0.031(2) 0.0004(16) -0.002(2) 0.003(2)
C33 0.083(4) 0.038(2) 0.039(2) 0.0028(19) -0.011(2) 0.014(2)
C34 0.093(4) 0.040(2) 0.039(3) -0.001(2) -0.010(3) 0.009(3)
C35 0.104(4) 0.045(3) 0.036(2) -0.002(2) -0.003(3) -0.002(3)
C36 0.079(4) 0.039(2) 0.042(3) -0.009(2) 0.003(2) 0.005(2)
C37 0.062(3) 0.0218(19) 0.050(3) -0.0006(17) -0.008(2) 0.000(2)
C38 0.059(3) 0.034(2) 0.056(3) 0.003(2) -0.009(2) 0.008(2)
C39 0.097(5) 0.041(3) 0.081(4) 0.001(3) -0.017(3) 0.029(3)
C40 0.078(4) 0.083(4) 0.109(5) 0.004(4) 0.020(4) 0.024(3)
C41 0.083(5) 0.039(3) 0.156(6) 0.001(3) -0.019(4) 0.011(3)
C42 0.139(7) 0.071(4) 0.101(5) 0.006(4) -0.033(5) 0.037(4)
N1B 0.070(13) 0.050(11) 0.071(15) -0.014(10) -0.002(10) 0.009(9)
C9B 0.079(13) 0.078(12) 0.096(14) -0.020(10) 0.001(11) -0.009(10)
C10B 0.12(2) 0.111(17) 0.118(18) -0.073(15) 0.032(15) -0.025(15)
C11B 0.14(2) 0.083(15) 0.22(3) -0.076(18) 0.08(2) -0.022(16)
C12B 0.105(19) 0.119(19) 0.12(2) -0.066(16) 0.023(16) -0.023(15)
C13B 0.076(13) 0.051(10) 0.066(12) -0.024(9) 0.004(11) -0.015(9)
C8B 0.058(12) 0.069(12) 0.125(18) -0.047(12) 0.024(12) -0.016(9)
 
_geom_special_details
;
 All esds (except the esd in the dihedral angle between two l.s. planes)
 are estimated using the full covariance matrix.  The cell esds are taken
 into account individually in the estimation of esds in distances, angles
 and torsion angles; correlations between esds in cell parameters are only
 used when they are defined by crystal symmetry.  An approximate (isotropic)
 treatment of cell esds is used for estimating esds involving l.s. planes.
;
 
loop_
 _geom_bond_atom_site_label_1
 _geom_bond_atom_site_label_2
 _geom_bond_distance
 _geom_bond_site_symmetry_2
 _geom_bond_publ_flag
O1 C2 1.262(5) . ?
O2 C4 1.263(5) . ?
O3 C6 1.243(5) . ?
O4 C14 1.187(5) . ?
O5 C14 1.354(6) . ?
O5 C15 1.489(6) . ?
O6 C26 1.211(5) . ?
O7 C26 1.327(5) . ?
O7 C27 1.481(5) . ?
O8 C38 1.188(5) . ?
O9 C38 1.336(5) . ?
O9 C39 1.510(6) . ?
N1 C8 1.396(9) . ?
N1 C7 1.417(9) . ?
N1 H1A 0.97(5) . ?
N2 C14 1.386(15) . ?
N2 C13 1.434(15) . ?
N2 H2A 0.66(3) . ?
N3 C20 1.300(7) . ?
N3 C19 1.322(8) . ?
N3 H3A 1.27(8) . ?
N4 C26 1.390(8) . ?
N4 C25 1.435(7) . ?
N4 H4A 0.98(4) . ?
N5 C31 1.312(5) . ?
N5 C32 1.415(5) . ?
N5 H5 0.88(6) . ?
N5 H2 1.43(12) . ?
N6 C38 1.385(6) . ?
N6 C37 1.393(6) . ?
N6 H6 0.73(3) . ?
C1 C7 1.375(6) . ?
C1 C2 1.434(6) . ?
C1 C6 1.458(6) . ?
C2 C3 1.455(6) . ?
C3 C19 1.374(6) . ?
C3 C4 1.455(6) . ?
C4 C5 1.442(6) . ?
C5 C31 1.396(5) . ?
C5 C6 1.461(6) . ?
C7 H7 0.9500 . ?
C8 C9 1.3900 . ?
C8 C13 1.3900 . ?
C9 C10 1.3900 . ?
C9 H9 0.9500 . ?
C10 C11 1.3900 . ?
C10 H10 0.9500 . ?
C11 C12 1.3900 . ?
C11 H11 0.9500 . ?
C12 C13 1.3900 . ?
C12 H12 0.9500 . ?
C15 C16 1.487(7) . ?
C15 C18 1.498(8) . ?
C15 C17 1.503(7) . ?
C16 H16A 0.9800 . ?
C16 H16B 0.9800 . ?
C16 H16C 0.9800 . ?
C17 H17A 0.9800 . ?
C17 H17B 0.9800 . ?
C17 H17C 0.9800 . ?
C18 H18A 0.9800 . ?
C18 H18B 0.9800 . ?
C18 H18C 0.9800 . ?
C19 H19 0.9500 . ?
C20 C21 1.3900 . ?
C20 C25 1.3900 . ?
C21 C22 1.3900 . ?
C21 H21 0.9500 . ?
C22 C23 1.3900 . ?
C22 H22 0.9500 . ?
C23 C24 1.3900 . ?
C23 H23 0.9500 . ?
C24 C25 1.3900 . ?
C24 H24 0.9500 . ?
C27 C29 1.495(7) . ?
C27 C30 1.505(7) . ?
C27 C28 1.510(7) . ?
C28 H28A 0.9800 . ?
C28 H28B 0.9800 . ?
C28 H28C 0.9800 . ?
C29 H29A 0.9800 . ?
C29 H29B 0.9800 . ?
C29 H29C 0.9800 . ?
C30 H30A 0.9800 . ?
C30 H30B 0.9800 . ?
C30 H30C 0.9800 . ?
C31 H31 0.9500 . ?
C32 C33 1.393(6) . ?
C32 C37 1.398(6) . ?
C33 C34 1.363(6) . ?
C33 H33 0.9500 . ?
C34 C35 1.363(7) . ?
C34 H34 0.9500 . ?
C35 C36 1.399(7) . ?
C35 H35 0.9500 . ?
C36 C37 1.374(6) . ?
C36 H36 0.9500 . ?
C39 C42 1.493(8) . ?
C39 C40 1.520(9) . ?
C39 C41 1.537(8) . ?
C40 H40A 0.9800 . ?
C40 H40B 0.9800 . ?
C40 H40C 0.9800 . ?
C41 H41A 0.9800 . ?
C41 H41B 0.9800 . ?
C41 H41C 0.9800 . ?
C42 H42A 0.9800 . ?
C42 H42B 0.9800 . ?
C42 H42C 0.9800 . ?
N1B C8B 1.42(2) . ?
N1B H1A 1.44(5) . ?
N2B C13B 1.53(3) . ?
N2B H2A 0.65(5) . ?
C9B C10B 1.3900 . ?
C9B C8B 1.3900 . ?
C9B H9B 0.9500 . ?
C10B C11B 1.3900 . ?
C10B H10B 0.9500 . ?
C11B C12B 1.3900 . ?
C11B H11B 0.9500 . ?
C12B C13B 1.3900 . ?
C12B H12B 0.9500 . ?
C13B C8B 1.3900 . ?
N3B C25B 1.838(16) . ?
N3B H3A 0.97(8) . ?
N4B C20B 1.349(11) . ?
N4B H4A 0.84(4) . ?
C20B C21B 1.3900 . ?
C20B C25B 1.3900 . ?
C21B C22B 1.3900 . ?
C21B H21B 0.9500 . ?
C22B C23B 1.3900 . ?
C22B H22B 0.9500 . ?
C23B C24B 1.3900 . ?
C23B H23B 0.9500 . ?
C24B C25B 1.3900 . ?
C24B H24B 0.9500 . ?
 
loop_
 _geom_angle_atom_site_label_1
 _geom_angle_atom_site_label_2
 _geom_angle_atom_site_label_3
 _geom_angle
 _geom_angle_site_symmetry_1
 _geom_angle_site_symmetry_3
 _geom_angle_publ_flag
C14 O5 C15 118.9(4) . . ?
C26 O7 C27 120.6(3) . . ?
C38 O9 C39 117.4(4) . . ?
C8 N1 C7 122.9(6) . . ?
C8 N1 H1A 123(3) . . ?
C7 N1 H1A 114(3) . . ?
C14 N2 C13 121.7(13) . . ?
C14 N2 H2A 117(3) . . ?
C13 N2 H2A 119(3) . . ?
C20 N3 C19 131.0(6) . . ?
C20 N3 H3A 122(3) . . ?
C19 N3 H3A 97(3) . . ?
C26 N4 C25 125.5(5) . . ?
C26 N4 H4A 109(3) . . ?
C25 N4 H4A 115(2) . . ?
C31 N5 C32 123.2(4) . . ?
C31 N5 H5 105(4) . . ?
C32 N5 H5 132(4) . . ?
C31 N5 H2 84(4) . . ?
C32 N5 H2 96(4) . . ?
H5 N5 H2 91(5) . . ?
C38 N6 C37 123.9(4) . . ?
C38 N6 H6 108(3) . . ?
C37 N6 H6 128(3) . . ?
C7 C1 C2 118.6(4) . . ?
C7 C1 C6 119.7(4) . . ?
C2 C1 C6 121.3(4) . . ?
O1 C2 C1 120.9(4) . . ?
O1 C2 C3 119.5(4) . . ?
C1 C2 C3 119.6(4) . . ?
C19 C3 C2 121.4(4) . . ?
C19 C3 C4 116.9(4) . . ?
C2 C3 C4 121.3(4) . . ?
O2 C4 C5 120.6(4) . . ?
O2 C4 C3 122.0(4) . . ?
C5 C4 C3 117.4(4) . . ?
C31 C5 C4 121.3(3) . . ?
C31 C5 C6 115.2(3) . . ?
C4 C5 C6 123.0(4) . . ?
O3 C6 C1 120.4(4) . . ?
O3 C6 C5 122.2(4) . . ?
C1 C6 C5 117.4(4) . . ?
C1 C7 N1 124.5(5) . . ?
C1 C7 H7 117.7 . . ?
N1 C7 H7 117.7 . . ?
C9 C8 C13 120.0 . . ?
C9 C8 N1 120.1(4) . . ?
C13 C8 N1 119.8(4) . . ?
C10 C9 C8 120.0 . . ?
C10 C9 H9 120.0 . . ?
C8 C9 H9 120.0 . . ?
C9 C10 C11 120.0 . . ?
C9 C10 H10 120.0 . . ?
C11 C10 H10 120.0 . . ?
C12 C11 C10 120.0 . . ?
C12 C11 H11 120.0 . . ?
C10 C11 H11 120.0 . . ?
C13 C12 C11 120.0 . . ?
C13 C12 H12 120.0 . . ?
C11 C12 H12 120.0 . . ?
C12 C13 C8 120.0 . . ?
C12 C13 N2 120.7(6) . . ?
C8 C13 N2 119.1(6) . . ?
O4 C14 O5 126.6(5) . . ?
O4 C14 N2 124.3(7) . . ?
O5 C14 N2 109.0(7) . . ?
C16 C15 O5 102.3(4) . . ?
C16 C15 C18 112.2(5) . . ?
O5 C15 C18 108.5(4) . . ?
C16 C15 C17 111.0(5) . . ?
O5 C15 C17 111.7(4) . . ?
C18 C15 C17 110.8(5) . . ?
N3 C19 C3 130.7(5) . . ?
N3 C19 H19 114.7 . . ?
C3 C19 H19 114.7 . . ?
N3 C20 C21 123.7(4) . . ?
N3 C20 C25 114.6(4) . . ?
C21 C20 C25 120.0 . . ?
C22 C21 C20 120.0 . . ?
C22 C21 H21 120.0 . . ?
C20 C21 H21 120.0 . . ?
C21 C22 C23 120.0 . . ?
C21 C22 H22 120.0 . . ?
C23 C22 H22 120.0 . . ?
C24 C23 C22 120.0 . . ?
C24 C23 H23 120.0 . . ?
C22 C23 H23 120.0 . . ?
C23 C24 C25 120.0 . . ?
C23 C24 H24 120.0 . . ?
C25 C24 H24 120.0 . . ?
C24 C25 C20 120.0 . . ?
C24 C25 N4 122.1(4) . . ?
C20 C25 N4 117.8(4) . . ?
O6 C26 O7 125.0(4) . . ?
O6 C26 N4 124.2(5) . . ?
O7 C26 N4 110.3(4) . . ?
O7 C27 C29 110.6(4) . . ?
O7 C27 C30 110.2(4) . . ?
C29 C27 C30 112.8(5) . . ?
O7 C27 C28 102.4(4) . . ?
C29 C27 C28 109.6(5) . . ?
C30 C27 C28 110.7(5) . . ?
N5 C31 C5 127.1(4) . . ?
N5 C31 H31 116.4 . . ?
C5 C31 H31 116.4 . . ?
C33 C32 C37 119.4(4) . . ?
C33 C32 N5 120.7(4) . . ?
C37 C32 N5 119.8(4) . . ?
C34 C33 C32 121.0(5) . . ?
C34 C33 H33 119.5 . . ?
C32 C33 H33 119.5 . . ?
C33 C34 C35 120.0(4) . . ?
C33 C34 H34 120.0 . . ?
C35 C34 H34 120.0 . . ?
C34 C35 C36 120.1(4) . . ?
C34 C35 H35 120.0 . . ?
C36 C35 H35 120.0 . . ?
C37 C36 C35 120.6(5) . . ?
C37 C36 H36 119.7 . . ?
C35 C36 H36 119.7 . . ?
C36 C37 N6 122.4(4) . . ?
C36 C37 C32 118.9(4) . . ?
N6 C37 C32 118.7(4) . . ?
O8 C38 O9 126.6(4) . . ?
O8 C38 N6 125.0(4) . . ?
O9 C38 N6 108.3(4) . . ?
C42 C39 O9 101.7(4) . . ?
C42 C39 C40 110.5(6) . . ?
O9 C39 C40 110.9(4) . . ?
C42 C39 C41 110.7(5) . . ?
O9 C39 C41 108.9(5) . . ?
C40 C39 C41 113.5(5) . . ?
C8B N1B H1A 119(2) . . ?
C13B N2B H2A 87(4) . . ?
C10B C9B C8B 120.0 . . ?
C10B C9B H9B 120.0 . . ?
C8B C9B H9B 120.0 . . ?
C9B C10B C11B 120.0 . . ?
C9B C10B H10B 120.0 . . ?
C11B C10B H10B 120.0 . . ?
C12B C11B C10B 120.0 . . ?
C12B C11B H11B 120.0 . . ?
C10B C11B H11B 120.0 . . ?
C13B C12B C11B 120.0 . . ?
C13B C12B H12B 120.0 . . ?
C11B C12B H12B 120.0 . . ?
C12B C13B C8B 120.0 . . ?
C12B C13B N2B 123.1(16) . . ?
C8B C13B N2B 116.1(16) . . ?
C13B C8B C9B 120.0 . . ?
C13B C8B N1B 119.2(13) . . ?
C9B C8B N1B 120.8(13) . . ?
C25B N3B H3A 133(5) . . ?
C20B N4B H4A 114(3) . . ?
N4B C20B C21B 120.6(7) . . ?
N4B C20B C25B 119.4(7) . . ?
C21B C20B C25B 120.0 . . ?
C22B C21B C20B 120.0 . . ?
C22B C21B H21B 120.0 . . ?
C20B C21B H21B 120.0 . . ?
C21B C22B C23B 120.0 . . ?
C21B C22B H22B 120.0 . . ?
C23B C22B H22B 120.0 . . ?
C24B C23B C22B 120.0 . . ?
C24B C23B H23B 120.0 . . ?
C22B C23B H23B 120.0 . . ?
C23B C24B C25B 120.0 . . ?
C23B C24B H24B 120.0 . . ?
C25B C24B H24B 120.0 . . ?
C24B C25B C20B 120.0 . . ?
C24B C25B N3B 114.0(6) . . ?
C20B C25B N3B 123.3(6) . . ?
 
loop_
 _geom_torsion_atom_site_label_1
 _geom_torsion_atom_site_label_2
 _geom_torsion_atom_site_label_3
 _geom_torsion_atom_site_label_4
 _geom_torsion
 _geom_torsion_site_symmetry_1
 _geom_torsion_site_symmetry_2
 _geom_torsion_site_symmetry_3
 _geom_torsion_site_symmetry_4
 _geom_torsion_publ_flag
C7 C1 C2 O1 4.6(7) . . . . ?
C6 C1 C2 O1 177.3(4) . . . . ?
C7 C1 C2 C3 -175.1(5) . . . . ?
C6 C1 C2 C3 -2.3(7) . . . . ?
O1 C2 C3 C19 -5.1(7) . . . . ?
C1 C2 C3 C19 174.5(5) . . . . ?
O1 C2 C3 C4 -176.8(4) . . . . ?
C1 C2 C3 C4 2.9(7) . . . . ?
C19 C3 C4 O2 3.4(7) . . . . ?
C2 C3 C4 O2 175.4(4) . . . . ?
C19 C3 C4 C5 -175.0(4) . . . . ?
C2 C3 C4 C5 -3.0(6) . . . . ?
O2 C4 C5 C31 -4.5(7) . . . . ?
C3 C4 C5 C31 174.0(4) . . . . ?
O2 C4 C5 C6 -175.8(4) . . . . ?
C3 C4 C5 C6 2.7(6) . . . . ?
C7 C1 C6 O3 -2.6(7) . . . . ?
C2 C1 C6 O3 -175.3(4) . . . . ?
C7 C1 C6 C5 174.6(5) . . . . ?
C2 C1 C6 C5 1.9(7) . . . . ?
C31 C5 C6 O3 3.2(6) . . . . ?
C4 C5 C6 O3 175.0(4) . . . . ?
C31 C5 C6 C1 -174.0(4) . . . . ?
C4 C5 C6 C1 -2.2(6) . . . . ?
C2 C1 C7 N1 175.6(6) . . . . ?
C6 C1 C7 N1 2.8(9) . . . . ?
C8 N1 C7 C1 178.6(6) . . . . ?
C7 N1 C8 C9 -57.1(9) . . . . ?
C7 N1 C8 C13 125.2(6) . . . . ?
C13 C8 C9 C10 0.0 . . . . ?
N1 C8 C9 C10 -177.7(5) . . . . ?
C8 C9 C10 C11 0.0 . . . . ?
C9 C10 C11 C12 0.0 . . . . ?
C10 C11 C12 C13 0.0 . . . . ?
C11 C12 C13 C8 0.0 . . . . ?
C11 C12 C13 N2 -175.3(10) . . . . ?
C9 C8 C13 C12 0.0 . . . . ?
N1 C8 C13 C12 177.7(5) . . . . ?
C9 C8 C13 N2 175.3(10) . . . . ?
N1 C8 C13 N2 -7.0(10) . . . . ?
C14 N2 C13 C12 -39.9(16) . . . . ?
C14 N2 C13 C8 144.8(8) . . . . ?
C15 O5 C14 O4 2.2(8) . . . . ?
C15 O5 C14 N2 -175.6(9) . . . . ?
C13 N2 C14 O4 18.5(18) . . . . ?
C13 N2 C14 O5 -163.6(10) . . . . ?
C14 O5 C15 C16 -175.8(5) . . . . ?
C14 O5 C15 C18 65.4(6) . . . . ?
C14 O5 C15 C17 -57.0(6) . . . . ?
C20 N3 C19 C3 161.0(8) . . . . ?
C2 C3 C19 N3 -8.3(10) . . . . ?
C4 C3 C19 N3 163.7(7) . . . . ?
C19 N3 C20 C21 -20.7(13) . . . . ?
C19 N3 C20 C25 144.5(8) . . . . ?
N3 C20 C21 C22 164.4(7) . . . . ?
C25 C20 C21 C22 0.0 . . . . ?
C20 C21 C22 C23 0.0 . . . . ?
C21 C22 C23 C24 0.0 . . . . ?
C22 C23 C24 C25 0.0 . . . . ?
C23 C24 C25 C20 0.0 . . . . ?
C23 C24 C25 N4 177.5(5) . . . . ?
N3 C20 C25 C24 -165.8(6) . . . . ?
C21 C20 C25 C24 0.0 . . . . ?
N3 C20 C25 N4 16.6(7) . . . . ?
C21 C20 C25 N4 -177.6(5) . . . . ?
C26 N4 C25 C24 -21.3(9) . . . . ?
C26 N4 C25 C20 156.2(6) . . . . ?
C27 O7 C26 O6 6.8(7) . . . . ?
C27 O7 C26 N4 179.0(5) . . . . ?
C25 N4 C26 O6 -8.6(10) . . . . ?
C25 N4 C26 O7 179.0(6) . . . . ?
C26 O7 C27 C29 -66.5(6) . . . . ?
C26 O7 C27 C30 59.0(6) . . . . ?
C26 O7 C27 C28 176.8(5) . . . . ?
C32 N5 C31 C5 -175.1(4) . . . . ?
C4 C5 C31 N5 -0.8(7) . . . . ?
C6 C5 C31 N5 171.2(4) . . . . ?
C31 N5 C32 C33 -41.4(7) . . . . ?
C31 N5 C32 C37 135.4(4) . . . . ?
C37 C32 C33 C34 0.7(7) . . . . ?
N5 C32 C33 C34 177.5(4) . . . . ?
C32 C33 C34 C35 -0.7(8) . . . . ?
C33 C34 C35 C36 0.1(8) . . . . ?
C34 C35 C36 C37 0.4(8) . . . . ?
C35 C36 C37 N6 -179.1(4) . . . . ?
C35 C36 C37 C32 -0.4(7) . . . . ?
C38 N6 C37 C36 -33.5(7) . . . . ?
C38 N6 C37 C32 147.7(5) . . . . ?
C33 C32 C37 C36 -0.2(7) . . . . ?
N5 C32 C37 C36 -177.0(4) . . . . ?
C33 C32 C37 N6 178.6(4) . . . . ?
N5 C32 C37 N6 1.8(6) . . . . ?
C39 O9 C38 O8 12.5(8) . . . . ?
C39 O9 C38 N6 -167.1(4) . . . . ?
C37 N6 C38 O8 1.0(8) . . . . ?
C37 N6 C38 O9 -179.3(4) . . . . ?
C38 O9 C39 C42 175.7(5) . . . . ?
C38 O9 C39 C40 58.2(6) . . . . ?
C38 O9 C39 C41 -67.4(6) . . . . ?
C8B C9B C10B C11B 0.0 . . . . ?
C9B C10B C11B C12B 0.0 . . . . ?
C10B C11B C12B C13B 0.0 . . . . ?
C11B C12B C13B C8B 0.0 . . . . ?
C11B C12B C13B N2B 169(2) . . . . ?
C12B C13B C8B C9B 0.0 . . . . ?
N2B C13B C8B C9B -170(2) . . . . ?
C12B C13B C8B N1B 177.5(16) . . . . ?
N2B C13B C8B N1B 7(2) . . . . ?
C10B C9B C8B C13B 0.0 . . . . ?
C10B C9B C8B N1B -177.5(16) . . . . ?
N4B C20B C21B C22B -179.0(10) . . . . ?
C25B C20B C21B C22B 0.0 . . . . ?
C20B C21B C22B C23B 0.0 . . . . ?
C21B C22B C23B C24B 0.0 . . . . ?
C22B C23B C24B C25B 0.0 . . . . ?
C23B C24B C25B C20B 0.0 . . . . ?
C23B C24B C25B N3B -162.0(8) . . . . ?
N4B C20B C25B C24B 179.0(10) . . . . ?
C21B C20B C25B C24B 0.0 . . . . ?
N4B C20B C25B N3B -20.7(11) . . . . ?
C21B C20B C25B N3B 160.3(9) . . . . ?
 
_diffrn_measured_fraction_theta_max    0.986
_diffrn_reflns_theta_full              25.03
_diffrn_measured_fraction_theta_full   0.986
_refine_diff_density_max    0.376
_refine_diff_density_min   -0.337
_refine_diff_density_rms    0.074
